# Supplementary material
Source: PubMed Central journal article supplement (PMC4567914)
Supplement: NIHMS715329-supplement-306850R2_Acknowledgment_Permissions.pdf [file NIHMS715329-supplement-306850R2_Acknowledgment_Permissions.pdf]

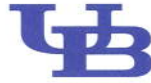

**University at Buffalo**  
*The State University of New York*

**Division of Cardiovascular Medicine**  
Department of Medicine  
School of Medicine and Biomedical Sciences

July 24, 2015

Roberto Bolli, M.D.  
Editor in Chief, *Circulation Research*  
3355 Keswick Rd., Main Bldg. 103  
Baltimore, MD 21211

Re: CIRCRES/2015/306850 R1

Dear Dr. Bolli:

This is to confirm that we have seen and approve mention of our names in the enclosed manuscript entitled *Comparative Efficacy of Intracoronary Allogeneic Mesenchymal Stem Cells and Cardiosphere-Derived Cells in Swine with Hibernating Myocardium* that has been submitted to *Circulation Research*

Acknowledgements

Elaine Granica

Rebeccah Young

Beth Palka

Anne Coe

Marsha Barber
